# Supplementary material for: A canine identity crisis: Genetic breed heritage testing of shelter dogs
Source: PubMed Central journal article supplement (PMC6107223; doi:10.1371/journal.pone.0202633), 2018-08-23

Hi Lisa,

Here are the most popular breeds for 2016:

### **San Diego**

1. Bulldogs
2. French Bulldogs
3. Labrador Retrievers
4. German Shepherds/Golden Retrievers
- 5.
6. Pembroke Welsh Corgis
7. Yorkshire Terriers
8. Siberian Huskies
9. Poodles
10. Dachshunds

### **Phoenix**

1. Labrador Retrievers
2. Golden Retrievers
3. German Shepherds
4. Bulldogs
5. French Bulldogs
6. Cavalier King Charles Spaniels
7. Poodles
8. Rottweilers
9. Yorkshire Terriers
10. Australian Shepherds

I hope that helps!

Best,

-Bill

William Ellis

Communications Coordinator

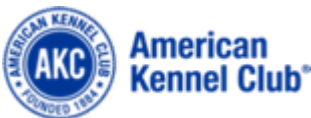

Supplement: pone.0202633.s002.pdf [file pone.0202633.s002.pdf]
